# Supplementary material for: Increase in Soil Carbon Pool Stability Rather Than Its Stock in Coastal Saline—Alkali Ditches following Reclamation Time
Source: MDPI journal article supplement (doi:10.3390/agronomy13112843), 2023-11-19
Supplement: s1 [file s1]

**Table S1** Summary of plant height, fresh weight, and coverage under different reclamation years

|                   | Reclamation years         |                            |                           |
|-------------------|---------------------------|----------------------------|---------------------------|
|                   | 1st year                  | 7th years                  | 15th years                |
| Plant height (cm) | 72.72 ± 5.23 <sup>b</sup> | 136.95 ± 3.29 <sup>a</sup> | 78.70 ± 3.28 <sup>b</sup> |
| Dry weight (kg)   | 0.46 ± 0.07 <sup>b</sup>  | 0.69 ± 0.04 <sup>a</sup>   | 0.41 ± 0.04 <sup>b</sup>  |
| Coverage (%)      | 54.08 ± 5.54 <sup>b</sup> | 84.33 ± 2.01 <sup>a</sup>  | 76.75 ± 4.43 <sup>a</sup> |

Values are mean ± standard error. Different lowercase letters of the same variable indicate significant differences at the level of  $p < 0.05$ .

**Table S2.** Redundancy analysis results for the soil carbon content of different components.

| Sorting axis                              | Axis 1 | Axis 2 | Axis 3 | Axis 4 |
|-------------------------------------------|--------|--------|--------|--------|
| Eigenvalues                               | 0.22   | 0.07   | 0.02   | 0.01   |
| Pseudo-canonical correlation              | 0.80   | 0.64   | 0.39   | 0.39   |
| Explained variation (cumulative)/%        | 21.74  | 29.05  | 30.95  | 32.26  |
| Explained fitted variation (cumulative)/% | 65.61  | 97.68  | 93.41  | 97.36  |
| Canonical eigenvalues                     | 0.33   |        |        |        |

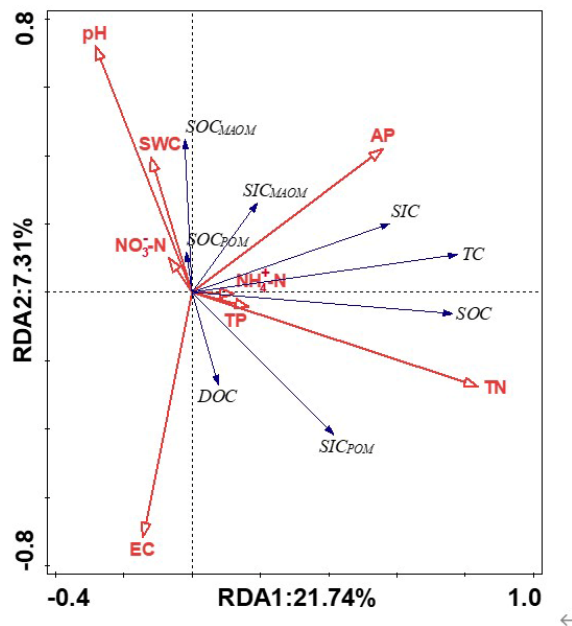

**Figure S1.** The relative abundance for single factors influences the soil carbon content of different components. (TC, soil total carbon; SOC, soil organic carbon; SIC, soil inorganic carbon; DOC, soil dissolved organic carbon; SOC<sub>POM</sub>, SOC in POM fraction; SOC<sub>MAOM</sub>, SOC in MAOM fraction; SIC<sub>POM</sub>, SIC in POM fraction; SIC<sub>MAOM</sub>, SIC in MAOM fraction; TN, soil total nitrogen; NH<sub>4</sub><sup>+</sup>-N, soil soluble ammonium nitrogen; NO<sub>3</sub><sup>-</sup>-N, soil soluble nitrate nitrogen; TP, soil total phosphorus; AP, soil available phosphorus; SWC, soil water content; pH, soil pH; and EC, soil electrical conductivity).
